# Supplementary material
Source: ML conference proceedings conference paper supplement (https://openaccess.thecvf.com/content/CVPR2024/html/Huang_Attribute-Guided_Pedestrian_Retrieval_CVPR_2024_paper.html)
Supplement: Supplementary file 1 [file Huang_Attribute-Guided_Pedestrian_Retrieval_CVPR_2024_supplemental.pdf]

# Attribute-Guided Pedestrian Retrieval: Bridging Person Re-ID with Internal Attribute Variability

## Supplementary Material

### 7. Attribute Grouping Details

In our study, we utilize 86 annotated attributes, which are systematically categorized into six distinct groups, as delineated in Tab. 1. To provide a comprehensive understanding, we have meticulously listed each attribute and corresponding group information in Tab. 5. This categorization not only aids in organizing the attributes for more effective analysis but also plays a crucial role in our proposed Attribute-Guided Transformer-based Pedestrian Retrieval (ATPR) framework, ensuring a structured approach to attribute analysis and retrieval.

### 8. Effective Retrieval with Inaccurate Witness Descriptions: The Strength of ATPR

In our experimental setup, we assume that the attribute information provided for the query is accurate, meaning that the gallery contains images of the query subject with the specified attribute changes. In other words, all attributes provided by witnesses are considered accurate. Imagine a scenario where multiple witnesses provide descriptions of a suspect involved in a crime. Each witness offers different attributes as follows:

- Witness 1 recalls the suspect wearing a green jacket.
- Witness 2 mentions a red scarf.
- Witness 3 describes the suspect as having a tattoo on the left arm.

In such a case, how our AGPR method works:

**Aggregating Multiple Witness Reports:** Our system can process each of these attributes separately and generate different lists of potential matches according each witness’s descriptions. If one of the witnesses provided accurate attribute information, our system increases the likelihood of correctly identifying the suspect. For example, if the green jacket is an accurate detail, suspects with green jackets would rank higher in the retrieval results.

**Handling Inaccurate Attributes:** In instances where some attributes are entirely inaccurate (e.g., there’s no individual in the gallery matching the red scarf attribute with the correct ID), our system still provides a similarity ranking based on the given attribute. While this may not lead directly to the suspect, it offers valuable insights and potential leads by showing individuals who match certain parts of the witness descriptions.

**Cross-referencing and Narrowing Down Candidates:** By comparing and cross-referencing the results from each attribute query, investigators can narrow down potential sus-

pects. Even if some attributes are incorrect, the overlap in retrieval results (like individuals appearing in both the green jacket and tattoo lists) can guide investigators towards more likely suspects from the similarity ranking list.

In summary, our ATPR approach is able to accommodate the uncertainty of real-world scenarios, where witness accounts may vary in accuracy. It leverages the power of attribute-guided retrieval to offer a versatile tool in the search for individuals, providing multiple angles of investigation and aiding in the accurate identification of suspects.

### 9. Focus and Scope

While our ATPR approach is theoretically capable of performing attribute recognition tasks, it is primarily designed and optimized for enhancing pedestrian retrieval with attribute guidance. Consequently, our focus in this work has been on leveraging attributes to refine the identification and retrieval of individuals, rather than explicitly conducting experiments in attribute recognition. This decision stems from our goal to demonstrate the efficacy of ATPR in the context of pedestrian retrieval, where attributes serve as supplementary information to improve retrieval accuracy. Therefore, although ATPR holds potential in attribute recognition, our experiments and analyses have been intentionally directed towards its application in attribute-guided retrieval, aligning with the main objective of our research.

### 10. About The PAR Dataset

In order to avoid raising ethical concerns, the PAR dataset [32] used in this paper is a publicly available dataset. For the PAR dataset used in this paper, we have accepted/signed the corresponding license agreement and do not modify any content in the dataset. In addition, the dataset used in this paper are obtained from their download link on the official website. We also acknowledge the use of the data by citing their corresponding literature.

Table 5. Attribute Grouping Information.

|                                                                                                                                                                                                                                                                                                                                                                                      |                                                                                                                                                                                                                                                                                                                                                                                                                                                                                                                                                                                                                                                                                                                                                                                                                                                                                                                                                                                           |                                                                                                                                                                                                                                                                                                                                                                                                                                                                                                                                                                                                                                                                                                                                                                                                                                      |                                                                                                                                                                                                                                                                                                                                                                                                                                                                                                                                                                                                                                                                                                                              |
|--------------------------------------------------------------------------------------------------------------------------------------------------------------------------------------------------------------------------------------------------------------------------------------------------------------------------------------------------------------------------------------|-------------------------------------------------------------------------------------------------------------------------------------------------------------------------------------------------------------------------------------------------------------------------------------------------------------------------------------------------------------------------------------------------------------------------------------------------------------------------------------------------------------------------------------------------------------------------------------------------------------------------------------------------------------------------------------------------------------------------------------------------------------------------------------------------------------------------------------------------------------------------------------------------------------------------------------------------------------------------------------------|--------------------------------------------------------------------------------------------------------------------------------------------------------------------------------------------------------------------------------------------------------------------------------------------------------------------------------------------------------------------------------------------------------------------------------------------------------------------------------------------------------------------------------------------------------------------------------------------------------------------------------------------------------------------------------------------------------------------------------------------------------------------------------------------------------------------------------------|------------------------------------------------------------------------------------------------------------------------------------------------------------------------------------------------------------------------------------------------------------------------------------------------------------------------------------------------------------------------------------------------------------------------------------------------------------------------------------------------------------------------------------------------------------------------------------------------------------------------------------------------------------------------------------------------------------------------------|
| <p><b>Group <math>a^1</math> (Basic Personal Attributes)</b></p> <p>Gender (Female:0 Male:1)<br/>           Age 16<br/>           Age 30<br/>           Age 45<br/>           Age 60<br/>           Body type slightly overweight<br/>           Body type standard<br/>           Body type slim</p>                                                                                | <p><b>Group <math>a^3</math> (Upper Body Clothing)</b></p> <p>Upper garment shirt<br/>           Upper garment sweater<br/>           Upper garment vest<br/>           Upper garment T-shirt<br/>           Upper garment cotton clothes<br/>           Upper garment jacket<br/>           Upper garment suit<br/>           Upper garment hoodie<br/>           Upper garment short sleeves<br/>           Upper garment other<br/>           Upper garment color black<br/>           Upper garment color white<br/>           Upper garment color gray<br/>           Upper garment color red<br/>           Upper garment color green<br/>           Upper garment color blue<br/>           Upper garment color silver<br/>           Upper garment color yellow<br/>           Upper garment color brown<br/>           Upper garment color purple<br/>           Upper garment color pink<br/>           Upper garment color orange<br/>           Upper garment color other</p> | <p><b>Group <math>a^4</math> (Lower Body Clothing)</b></p> <p>Lower garment trousers<br/>           Lower garment skirt<br/>           Lower garment short skirt<br/>           Lower garment dress<br/>           Lower garment jeans<br/>           Lower garment leggings<br/>           Lower garment color black<br/>           Lower garment color white<br/>           Lower garment color gray<br/>           Lower garment color red<br/>           Lower garment color green<br/>           Lower garment color blue<br/>           Lower garment color silver<br/>           Lower garment color yellow<br/>           Lower garment color brown<br/>           Lower garment color purple<br/>           Lower garment color pink<br/>           Lower garment color orange<br/>           Lower garment color other</p> | <p><b>Group <math>a^5</math> (Footwear)</b></p> <p>Shoe type leather shoes<br/>           Shoe type sports shoes<br/>           Shoe type boots<br/>           Shoe type cloth shoes<br/>           Shoe type casual shoes<br/>           Shoe type other<br/>           Shoe color black<br/>           Shoe color white<br/>           Shoe color gray<br/>           Shoe color red<br/>           Shoe color green<br/>           Shoe color blue<br/>           Shoe color silver<br/>           Shoe color yellow<br/>           Shoe color brown<br/>           Shoe color purple<br/>           Shoe color pink<br/>           Shoe color orange<br/>           Shoe color mixed<br/>           Shoe color other</p> |
| <p><b>Group <math>a^2</math> (Head and Shoulder)</b></p> <p>Hairstyle bald<br/>           Hairstyle long hair<br/>           Head and shoulders black hair<br/>           Head and shoulders wearing a hat<br/>           Head and shoulders glasses<br/>           Head and shoulders sunglasses<br/>           Head and shoulders scarf<br/>           Head and shoulders mask</p> |                                                                                                                                                                                                                                                                                                                                                                                                                                                                                                                                                                                                                                                                                                                                                                                                                                                                                                                                                                                           |                                                                                                                                                                                                                                                                                                                                                                                                                                                                                                                                                                                                                                                                                                                                                                                                                                      | <p><b>Group <math>a^6</math> (Accessory)</b></p> <p>Accessory backpack<br/>           Accessory shoulder bag<br/>           Accessory handbag<br/>           Accessory suitcase<br/>           Accessory plastic bag<br/>           Accessory paper bag<br/>           Accessory car<br/>           Accessory other</p>                                                                                                                                                                                                                                                                                                                                                                                                      |
